# Supplementary material for: Long-term stress levels are synchronized in dogs and their owners
Source: PubMed Central journal article supplement (PMC6554395; doi:10.1038/s41598-019-43851-x), 2019-06-06
Supplement: 41598_2019_43851_MOESM1_ESM.pdf [file 41598_2019_43851_MOESM1_ESM.pdf]

S1

Long-term stress levels are synchronized in dogs and their owners

Ann-Sofie Sundman, Enya Van Poucke, AnnCharlotte SvenssonHolm, Åshild Faresjö,  
Elvar Theodorsson, Per Jensen, Lina S.V. Roth

S1

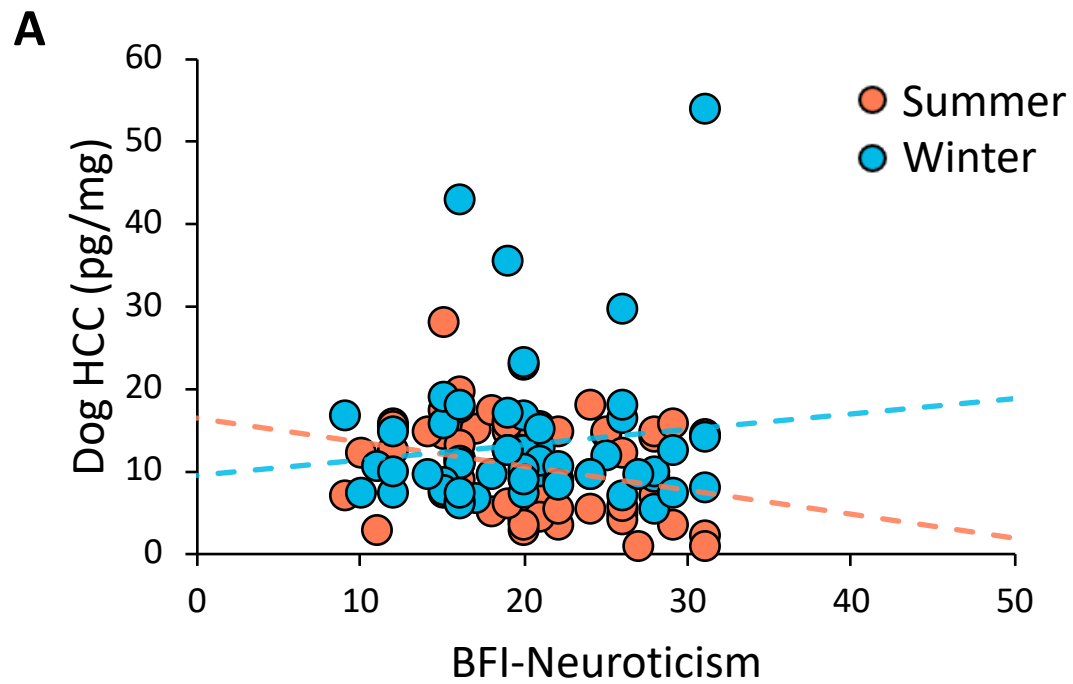

**S1.** Three personality traits of the owners affected dog hair cortisol concentrations (HCC). Neuroticism (A) affected HCC on both sampling occasions (red: summer, blue: winter), whereas conscientiousness (B) and openness (C) affected winter HCC. Dotted lines show linear fitted lines for all personality traits but note that the outlier in (A) affects the fitted line in opposite direction compared to the result of the tested model.

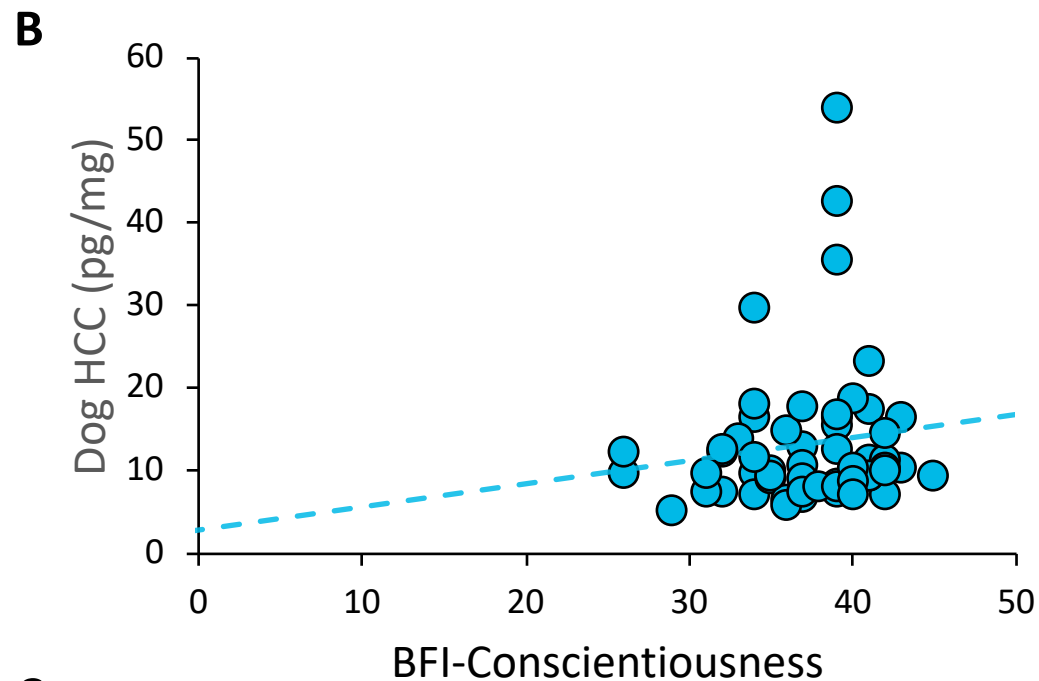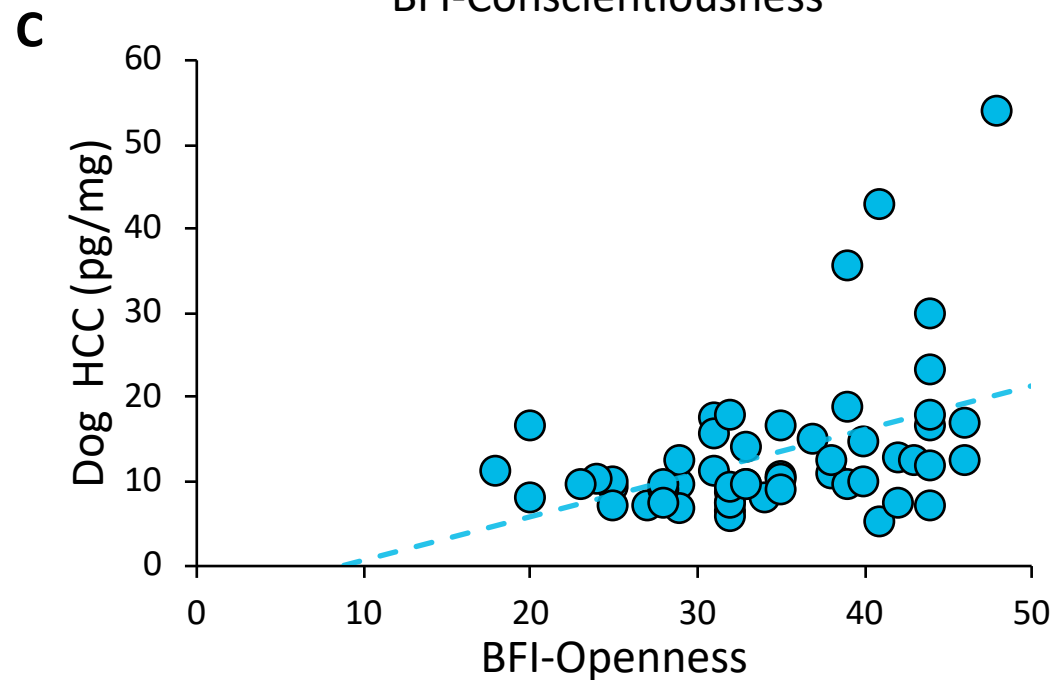

Ann-Sofie Sundman, Enya Van Poucke, Ann Charlotte Svensson Holm,  
 Åshild Faresjö, Elvar Theodorsson, Per Jensen, Lina S.V. Roth  
 Long-term stress levels are synchronized in  
 dogs and their owners

## Table S1 - Final Models

### Generalized Linear Model - effents on dogHCC

| Dependent variable:       |  | DogHCC summer sample |    |          | DogHCC winter sample |    |          |
|---------------------------|--|----------------------|----|----------|----------------------|----|----------|
| Model type:               |  | Normal with identity |    |          | Gamma with log link  |    |          |
|                           |  | Wald Chi Square      | df | P        | Wald Chi Square      | df | P        |
| <b>HumanHCC-summer</b>    |  | 23,697               |    | 1 <0.001 | 13,796               |    | 1 <0.001 |
| <b>Breed</b>              |  | 2,611                |    | 1 0,106  | 6,451                |    | 1 0,011  |
| <b>Sex</b>                |  | 1,678                |    | 1 0,195  |                      |    |          |
| <b>Lifestyle</b>          |  | 0,523                |    | 1 0,47   |                      |    |          |
| <b>HumanHCC*breed</b>     |  | 3,722                |    | 1 0,054  |                      |    |          |
| <b>HumanHCC*sex</b>       |  | 5,2                  |    | 1 0,023  |                      |    |          |
| <b>HumanHCC*lifestyle</b> |  | 6,268                |    | 1 0,012  |                      |    |          |

### Generalized Linear Model - owner personality

| Dependent variable:          |  | DogHCC summer sample |    |         | DogHCC winter sample |    |          |
|------------------------------|--|----------------------|----|---------|----------------------|----|----------|
| Model type:                  |  | Normal with identity |    |         | Gamma with log link  |    |          |
|                              |  | Wald Chi Square      | df | P       | Wald Chi Square      | df | P        |
| <b>Sex</b>                   |  | 3,765                |    | 1 0,052 | 13,198               |    | 1 <0.001 |
| <b>Extraversion</b>          |  |                      |    |         |                      |    |          |
| <b>Agreeableness</b>         |  |                      |    |         | 0,945                |    | 1 0,331  |
| <b>Conscientiousness</b>     |  |                      |    |         | 15,852               |    | 1 <0.001 |
| <b>Neuroticism</b>           |  | 7,951                |    | 1 0,005 | 4,919                |    | 1 0,027  |
| <b>Openness</b>              |  | 2,907                |    | 1 0,088 | 11,44                |    | 1 0,001  |
| <b>Sex*extraversion</b>      |  |                      |    |         |                      |    |          |
| <b>Sex*agreeableness</b>     |  |                      |    |         | 4,298                |    | 1 0,038  |
| <b>Sex*conscientiousness</b> |  |                      |    |         | 11,54                |    | 1 0,001  |
| <b>Sex*neuroticism</b>       |  |                      |    |         | 21,437               |    | 1 <0.001 |
| <b>Sex*openness</b>          |  | 5,39                 |    | 1 0,02  |                      |    |          |

**Generalized Linear Model - dog personality**

| Dependent variable:               |                 | DogHCC summer sample |       |                 | DogHCC winter sample |       |  |
|-----------------------------------|-----------------|----------------------|-------|-----------------|----------------------|-------|--|
| Model type:                       |                 | Normal with identity |       |                 | Gamma with log link  |       |  |
|                                   | Wald Chi Square | df                   | P     | Wald Chi Square | df                   | P     |  |
| <b>Sex</b>                        | 4,042           | 1                    | 0,044 | 10,657          | 1                    | 0,001 |  |
| <b>Fearfulness</b>                |                 |                      |       |                 |                      |       |  |
| <b>Aggression towards people</b>  |                 |                      |       |                 |                      |       |  |
| <b>Activity/excitability</b>      |                 |                      |       |                 |                      |       |  |
| <b>Responsiveness to training</b> |                 |                      |       | 0,533           | 1                    | 0,465 |  |
| <b>Agression towards animals</b>  |                 |                      |       |                 |                      |       |  |
| <b>Sex*Fearfulness</b>            |                 |                      |       |                 |                      |       |  |
| <b>Sex*Aggr. ppl.</b>             |                 |                      |       |                 |                      |       |  |
| <b>Sex*activity/exc.</b>          |                 |                      |       |                 |                      |       |  |
| <b>Sex*responsiveness</b>         |                 |                      |       | 9,144           | 1                    | 0,002 |  |
| <b>Sex*agg. animals</b>           |                 |                      |       |                 |                      |       |  |

**Generalized Linear Mixed Model - seasonal effects**

Repeated measure: Season (winter/summer)  
 Dependent variable: DogHCC  
 Model type: Gamma with log link

|                         | F     | df1 | df2 | P     |
|-------------------------|-------|-----|-----|-------|
| <b>Season</b>           | 8,706 | 1   | 106 | 0,004 |
| <b>Breed</b>            |       |     |     |       |
| <b>Sex</b>              | 5,27  | 1   | 106 | 0,024 |
| <b>Lifestyle</b>        | 1,064 | 1   | 106 | 0,305 |
| <b>Season*breed</b>     |       |     |     |       |
| <b>Season*sex</b>       |       |     |     |       |
| <b>Season*lifestyle</b> | 6,143 | 1   | 106 | 0,015 |

### Long-term stress levels are synchronized in dogs and their owners

Ann-Sofie Sundman, Enya Van Poucke, AnnCharlotte SvenssonHolm, Åshild Faresjö,  
Elvar Theodorsson, Per Jensen, Lina S.V. Roth

### Supplementary Dataset

| ID-Number | Breed (SS/BC) | Sex of the dog | Owner Age | Dog Age | Other Animals (N0_Dog1_Cat2_DogCat3) |
|-----------|---------------|----------------|-----------|---------|--------------------------------------|
| 1         | SS            | F              | 66        | 2       | 0                                    |
| 2         | BC            | M              | 44        | 10      | 3                                    |
| 3         | BC            | M              | 49        | 7       | 1                                    |
| 5         | BC            | M              | 34        | 5       | 3                                    |
| 7         | SS            | F              | 39        | 9       | 1                                    |
| 8         | SS            | M              | 67        | 2       | 2                                    |
| 11        | BC            | F              | 33        | 3       | 1                                    |
| 12        | SS            | M              | 55        | 4       | 1                                    |
| 13        | SS            | M              | 20        | 4       | 0                                    |
| 14        | BC            | M              | 68        | 10      | 0                                    |
| 15        | SS            | F              | 53        | 5       | 0                                    |
| 17        | BC            | F              | 28        | 3       | 3                                    |
| 19        | BC            | F              | 59        | 3       | 2                                    |
| 22        | BC            | M              | 61        | 2       | 3                                    |
| 23        | SS            | F              | 62        | 1       | 2                                    |
| 25        | SS            | M              | 27        | 5       | 3                                    |
| 26        | BC            | M              | 27        | 2       | 1                                    |
| 29        | SS            | M              | 28        | 2       | 1                                    |
| 30        | BC            | M              | 62        | 3       | 3                                    |
| 31        | SS            | M              | 61        | 8       | 3                                    |
| 32        | BC            | F              | 44        | 1       | 3                                    |
| 33        | BC            | M              | 42        | 1       | 3                                    |
| 34        | BC            | F              | 22        | 1       | 0                                    |
| 35        | SS            | M              | 51        | 1       | 3                                    |
| 36        | SS            | M              | 51        | 4       | 1                                    |
| 37        | BC            | F              | 52        | 9       | 2                                    |
| 38        | BC            | F              | 51        | 6       | 3                                    |
| 40        | SS            | M              | 58        | 3       | 0                                    |
| 41        | SS            | M              | 30        | 3       | 1                                    |
| 44        | SS            | M              | 28        | 2       | 0                                    |
| 48        | SS            | F              | 28        | 2       | 3                                    |
| 49        | SS            | M              | 45        | 5       | 1                                    |
| 51        | SS            | M              | 57        | 10      | 3                                    |
| 54        | SS            | M              | 49        | 7       | 1                                    |
| 55        | SS            | M              | 25        | 8       | 1                                    |
| 56        | BC            | M              | 55        | 10      | 1                                    |
| 10A       | SS            | F              | 39        | 8       | 3                                    |
| 10B       | SS            | F              | 39        | 6       | 3                                    |
| 18A       | BC            | M              | 38        | 8       | 1                                    |
| 18B       | BC            | M              | 38        | 4       | 1                                    |
| 20A       | BC            | F              | 55        | 7       | 1                                    |
| 20B       | BC            | F              | 55        | 3       | 1                                    |
| 21A       | SS            | M              | 34        | 2       | 1                                    |
| 21B       | SS            | M              | 34        | 6       | 1                                    |
| 24A       | SS            | M              | 59        | 8       | 1                                    |
| 24B       | SS            | M              | 59        | 1       | 1                                    |
| 28A       | BC            | F              | 27        | 2       | 1                                    |
| 28B       | BC            | F              | 27        | 4       | 1                                    |
| 42A       | SS            | M              | 62        | 6       | 1                                    |
| 42B       | BC            | M              | 62        | 4       | 1                                    |
| 4A        | SS            | F              | 48        | 10      | 1                                    |
| 4B        | SS            | F              | 48        | 7       | 1                                    |
| 50A       | SS            | M              | 54        | 2       | 1                                    |
| 50B       | SS            | M              | 54        | 1       | 1                                    |
| 53A       | BC            | F              | 56        | 8       | 1                                    |
| 53B       | BC            | F              | 56        | 6       | 1                                    |
| 9A        | SS            | F              | 50        | 4       | 3                                    |
| 9B        | SS            | M              | 50        | 2       | 3                                    |

SS= Shetland sheepdog

BC= Border collie

| ID-Number | Garden (Yes/No) | Lifestyle (Competing/Pet) | Trainings/Week | Competed last 6 months (Yes/No) |
|-----------|-----------------|---------------------------|----------------|---------------------------------|
| 1         | Y               | P                         | 0              | N                               |
| 2         | Y               | C                         | 3              | Y                               |
| 3         | N               | C                         | 4,5            | Y                               |
| 5         | Y               | C                         | 1              | Y                               |
| 7         | Y               | C                         | 1              | Y                               |
| 8         | Y               | P                         | 0              | N                               |
| 11        | Y               | C                         | 5              | Y                               |
| 12        | Y               | C                         | 3,5            | Y                               |
| 13        | N               | P                         | 2              | N                               |
| 14        | Y               | P                         | 0              | N                               |
| 15        | Y               | P                         | 0              | N                               |
| 17        | Y               | P                         | 0              | N                               |
| 19        | N               | P                         | 6,5            | N                               |
| 22        | Y               | C                         | 3,5            | Y                               |
| 23        | Y               | P                         | 0              | N                               |
| 25        | Y               | C                         | 5              | Y                               |
| 26        | N               | C                         | 3              | Y                               |
| 29        | Y               | C                         | 5              | Y                               |
| 30        | Y               | C                         | 6              | Y                               |
| 31        | Y               | P                         | 1              | N                               |
| 32        | Y               | P                         | 0              | N                               |
| 33        | Y               | P                         | 0              | N                               |
| 34        | N               | P                         | 2              | N                               |
| 35        | Y               | P                         | 2              | N                               |
| 36        | Y               | C                         | 1,5            | Y                               |
| 37        | Y               | P                         | 0              | N                               |
| 38        | Y               | P                         | 7              | N                               |
| 40        | Y               | C                         | 2,5            | Y                               |
| 41        | N               | P                         | 2              | N                               |
| 44        | N               | P                         | 1              | N                               |
| 48        | Y               | C                         | 3              | Y                               |
| 49        | Y               | C                         | 7              | Y                               |
| 51        | N               | P                         | 0              | N                               |
| 54        | Y               | P                         | 1              | N                               |
| 55        | N               | C                         | 5              | Y                               |
| 56        |                 | P                         |                |                                 |
| 10A       | Y               | C                         | 1              | Y                               |
| 10B       | Y               | C                         | 1              | Y                               |
| 18A       | Y               | P                         | 4              | N                               |
| 18B       | Y               | P                         | 4              | N                               |
| 20A       | Y               | C                         | 5              | N                               |
| 20B       | Y               | C                         | 4              | N                               |
| 21A       | N               | C                         | 3,5            | Y                               |
| 21B       | N               | C                         | 3,5            | Y                               |
| 24A       | Y               | C                         | 5              | Y                               |
| 24B       | Y               | C                         | 6              | Y                               |
| 28A       | Y               | C                         | 3              | Y                               |
| 28B       | Y               | C                         | 4              | Y                               |
| 42A       | Y               | C                         | 3              | Y                               |
| 42B       | Y               | C                         | 3,5            | Y                               |
| 4A        | Y               | P                         | 1              | N                               |
| 4B        | N               | P                         | 1              | N                               |
| 50A       | Y               | P                         | 0              | N                               |
| 50B       | Y               | P                         | 0              | N                               |
| 53A       | Y               | C                         | 5              | Y                               |
| 53B       | Y               | C                         | 5              | Y                               |
| 9A        | Y               | C                         | 2,5            | Y                               |
| 9B        | Y               | C                         | 2,5            | Y                               |

Hair cortisol concentrations (HCC)

| ID-Number | Owner Summer H | Dog Summer HCC | Owner Winter HCC | Dog Winter HCC |
|-----------|----------------|----------------|------------------|----------------|
| 1         | 28,2           | 14,6           | 24,1             | 35,4           |
| 2         | 43,1           | 14,5           | 78,8             | 15,6           |
| 3         | 15,6           | 18,0           | 12,0             | 9,4            |
| 5         | 17,6           | 14,8           | 5,8              | 9,4            |
| 7         | 18,9           | 6,8            | 12,1             | 16,4           |
| 8         | 13,8           | 5,4            | 13,6             | 9,6            |
| 11        | 21,5           | 16,0           | 33,2             | 16,6           |
| 12        | 20,1           | 15,4           | 2,1              | 12,7           |
| 13        | 7,5            | 7,0            | 7,7              | 5,3            |
| 14        | 32,9           | 2,6            | 19,2             | 10,4           |
| 15        | 26,9           | 12,3           | 18,0             | 7,1            |
| 17        | 6,0            | 4,9            | 15,1             | 9,7            |
| 19        | 56,7           | 15,0           | 29,7             | 10,7           |
| 22        | 7,2            | 22,6           | 28,7             | 23,2           |
| 23        | 32,1           | 14,4           | 26,7             | 53,9           |
| 25        | 23,1           | 14,9           | 26,9             | 6,7            |
| 26        | 9,4            | 2,2            | 19,1             | 13,9           |
| 29        | 8,3            | 3,3            | 16,3             | 8,9            |
| 30        | 6,1            | 0,7            | 18,7             | 9,4            |
| 31        | 36,1           | 7,2            | 44,8             | 18,7           |
| 32        | 20,2           | 15,5           | 49,8             | 12,3           |
| 33        | 8,8            | 6,6            | 4,1              | 11,1           |
| 34        | 21,4           | 3,9            | 6,1              | 7,3            |
| 35        | 6,2            | 19,5           | 13,0             | 42,7           |
| 36        | 24,1           | 14,7           | 7,8              | 10,3           |
| 37        |                |                |                  |                |
| 38        | 28,6           | 14,3           |                  |                |
| 40        | 15,5           | 4,2            | 9,1              | 14,8           |
| 41        | 17,3           | 14,8           | 12,6             | 11,7           |
| 44        | 21,8           | 0,8            | 22,2             | 8,0            |
| 48        | 9,3            | 5,4            | 8,7              | 8,1            |
| 49        | 18,1           | 17,2           | 9,0              | 9,3            |
| 51        | 4,0            | 3,4            | 8,2              | 7,3            |
| 54        | 27,9           | 12,2           | 13,8             | 7,1            |
| 55        | 11,6           | 4,9            |                  |                |
| 56        | 6,1            | 5,8            | 7,5              | 12,4           |
| 10A       | 13,5           | 9,0            | 10,0             | 11,2           |
| 10B       | 13,5           | 10,9           | 10,0             | 17,4           |
| 18A       | 10,9           | 4,7            | 27,2             | 16,4           |
| 18B       | 10,9           | 4,1            | 27,2             | 6,9            |
| 20A       | 35,1           | 27,9           | 6,0              | 8,5            |
| 20B       | 35,1           | 17,2           | 6,0              | 7,5            |
| 21A       | 15,1           | 8,9            | 19,0             | 9,7            |
| 21B       | 15,1           | 3,5            | 19,0             | 12,3           |
| 24A       | 23,2           | 14,0           | 15,1             | 9,1            |
| 24B       | 23,2           | 14,8           | 15,1             | 9,8            |
| 28A       | 24,3           | 11,1           | 12,1             | 6,4            |
| 28B       | 24,3           | 11,6           | 12,1             | 5,8            |
| 42A       | 26,0           | 11,4           | 14,7             | 17,8           |
| 42B       | 26,0           | 13,2           | 14,7             | 7,3            |
| 4A        | 31,4           | 15,8           | 26,6             | 12,5           |
| 4B        | 31,4           | 15,7           | 26,6             | 16,9           |
| 50A       | 7,7            | 2,6            | 8,5              | 10,2           |
| 50B       | 7,7            | 3,4            | 8,5              | 8,8            |
| 53A       | 6,4            | 5,7            | 70,0             | 17,9           |
| 53B       | 6,4            | 12,2           | 70,0             | 29,7           |
| 9A        | 25,6           | 15,5           | 22,0             | 9,9            |
| 9B        | 25,6           | 15,1           | 22,0             | 14,5           |

Activity smart collar - PetPace™

| ID-Number | Rest % | Low % | Medium % | High % |
|-----------|--------|-------|----------|--------|
| 1         |        |       |          |        |
| 2         | 79,9   | 7,8   | 8,3      | 3,9    |
| 3         |        |       |          |        |
| 5         | 86,3   | 3,1   | 5,0      | 5,5    |
| 7         | 79,2   | 6,4   | 10,9     | 3,5    |
| 8         | 75,5   | 6,9   | 10,4     | 7,2    |
| 11        | 77,4   | 6,4   | 13,0     | 3,2    |
| 12        | 76,4   | 7,7   | 12,2     | 3,7    |
| 13        | 77,0   | 6,2   | 10,1     | 6,7    |
| 14        |        |       |          |        |
| 15        | 74,5   | 8,6   | 9,2      | 7,7    |
| 17        | 76,2   | 5,6   | 10,0     | 8,2    |
| 19        |        |       |          |        |
| 22        | 77,0   | 6,9   | 11,1     | 4,9    |
| 23        | 77,5   | 7,7   | 11,7     | 3,1    |
| 25        | 66,4   | 9,4   | 16,7     | 7,5    |
| 26        | 80,5   | 5,9   | 11,1     | 2,6    |
| 29        |        |       |          |        |
| 30        | 78,1   | 6,0   | 8,5      | 7,3    |
| 31        | 84,1   | 5,9   | 8,4      | 1,6    |
| 32        | 75,0   | 6,4   | 13,6     | 5,0    |
| 33        |        |       |          |        |
| 34        | 74,8   | 7,0   | 10,9     | 7,3    |
| 35        |        |       |          |        |
| 36        | 73,4   | 5,9   | 14,4     | 6,3    |
| 37        | 73,1   | 8,1   | 11,8     | 7,0    |
| 38        | 80,7   | 5,1   | 9,8      | 4,4    |
| 40        | 64,2   | 9,4   | 18,1     | 8,2    |
| 41        | 81,5   | 7,5   | 8,6      | 2,4    |
| 44        | 65,5   | 10,4  | 19,6     | 4,5    |
| 48        | 69,3   | 9,9   | 14,9     | 6,0    |
| 49        | 78,9   | 5,9   | 9,6      | 5,6    |
| 51        | 78,1   | 6,5   | 6,6      | 8,9    |
| 54        | 78,8   | 9,2   | 9,7      | 2,3    |
| 55        |        |       |          |        |
| 56        | 83,0   | 5,6   | 8,6      | 2,8    |
| 10A       | 67,8   | 10,9  | 19,3     | 2,1    |
| 10B       | 75,6   | 7,6   | 12,7     | 4,2    |
| 18A       | 84,8   | 4,4   | 5,2      | 5,6    |
| 18B       | 83,3   | 4,2   | 6,5      | 6,1    |
| 20A       | 87,4   | 4,6   | 6,6      | 1,5    |
| 20B       | 83,8   | 6,0   | 6,9      | 3,3    |
| 21A       | 72,0   | 8,6   | 14,6     | 4,8    |
| 21B       | 78,3   | 6,9   | 9,5      | 5,2    |
| 24A       | 75,4   | 7,3   | 10,0     | 7,3    |
| 24B       | 62,0   | 8,1   | 18,3     | 11,7   |
| 28A       | 77,1   | 8,0   | 8,4      | 6,4    |
| 28B       | 71,7   | 9,7   | 13,8     | 4,7    |
| 42A       |        |       |          |        |
| 42B       |        |       |          |        |
| 4A        |        |       |          |        |
| 4B        |        |       |          |        |
| 50A       |        |       |          |        |
| 50B       | 60,1   | 10,6  | 22,1     | 7,2    |
| 53A       | 79,3   | 6,9   | 9,0      | 4,9    |
| 53B       | 79,3   | 7,5   | 9,9      | 3,3    |
| 9A        | 83,1   | 5,1   | 9,9      | 2,0    |
| 9B        | 80,3   | 6,3   | 10,8     | 2,6    |



Personality traits

Owner

| ID-Number | BFI-Extraversion | BFI-Agreeableness | BFI-Conscientiousness | BFI-Neuroticism | BFI-Openness |
|-----------|------------------|-------------------|-----------------------|-----------------|--------------|
| 1         | 34               | 44                | 39                    | 19              | 39           |
| 2         | 31               | 38                | 39                    | 15              | 31           |
| 3         | 31               | 33                | 35                    | 24              | 28           |
| 5         | 33               | 40                | 45                    | 14              | 23           |
| 7         | 32               | 41                | 43                    | 9               | 20           |
| 8         | 20               | 35                | 31                    | 24              | 33           |
| 11        | 31               | 35                | 39                    | 20              | 35           |
| 12        | 28               | 36                | 37                    | 21              | 42           |
| 13        | 13               | 36                | 29                    | 28              | 41           |
| 14        | 33               | 42                | 43                    | 11              | 35           |
| 15        | 34               | 41                | 42                    | 12              | 27           |
| 17        | 25               | 42                | 34                    | 21              | 33           |
| 19        | 26               | 34                | 37                    | 16              | 38           |
| 22        | 19               | 38                | 41                    | 20              | 44           |
| 23        | 25               | 37                | 39                    | 31              | 48           |
| 25        | 33               | 37                | 37                    | 17              | 29           |
| 26        | 28               | 32                | 33                    | 31              | 33           |
| 29        | 22               | 37                | 37                    | 22              | 28           |
| 30        | 32               | 38                | 41                    | 27              | 39           |
| 31        | 31               | 37                | 40                    | 15              | 39           |
| 32        | 29               | 39                | 32                    | 29              | 43           |
| 33        | 21               | 31                | 42                    | 21              | 18           |
| 34        | 32               | 40                | 32                    | 20              | 28           |
| 35        | 30               | 38                | 39                    | 16              | 41           |
| 36        | 21               | 32                | 42                    | 22              | 24           |
| 37        | 39               | 38                | 36                    | 23              | 47           |
| 38        | 17               | 31                | 35                    | 25              | 47           |
| 40        | 33               | 44                | 36                    | 21              | 37           |
| 41        | 23               | 37                | 34                    | 25              | 44           |
| 44        | 35               | 43                | 38                    | 31              | 34           |
| 48        | 31               | 29                | 39                    | 22              | 20           |
| 49        | 33               | 40                | 41                    | 18              | 32           |
| 51        | 23               | 40                | 31                    | 29              | 42           |
| 54        | 29               | 31                | 40                    | 10              | 25           |
| 55        | 33               | 33                | 42                    | 18              | 36           |
| 56        | 32               | 37                | 32                    | 19              | 38           |
| 10A       | 31               | 41                | 41                    | 16              | 31           |
| 10B       | 31               | 41                | 41                    | 16              | 31           |
| 18A       | 27               | 29                | 34                    | 26              | 44           |
| 18B       | 27               | 29                | 34                    | 26              | 44           |
| 20A       | 34               | 43                | 39                    | 15              | 32           |
| 20B       | 34               | 43                | 39                    | 15              | 32           |
| 21A       | 28               | 38                | 26                    | 20              | 29           |
| 21B       | 28               | 38                | 26                    | 20              | 29           |
| 24A       | 26               | 26                | 35                    | 28              | 25           |
| 24B       | 26               | 26                | 35                    | 28              | 25           |
| 28A       | 27               | 38                | 36                    | 16              | 32           |
| 28B       | 27               | 38                | 36                    | 16              | 32           |
| 42A       | 25               | 38                | 37                    | 16              | 32           |
| 42B       | 25               | 38                | 37                    | 16              | 32           |
| 4A        | 33               | 32                | 39                    | 19              | 46           |
| 4B        | 33               | 32                | 39                    | 19              | 46           |
| 50A       | 32               | 38                | 40                    | 20              | 35           |
| 50B       | 32               | 38                | 40                    | 20              | 35           |
| 53A       | 33               | 38                | 34                    | 26              | 44           |
| 53B       | 33               | 38                | 34                    | 26              | 44           |
| 9A        | 26               | 43                | 42                    | 12              | 40           |
| 9B        | 26               | 43                | 42                    | 12              | 40           |

Personality traits

Dog

| ID-Number | Factor1 Fearful | Factor2 Aggressive | Factor3 Activity | Factor4 Responsive | Factor5 Aggressive |
|-----------|-----------------|--------------------|------------------|--------------------|--------------------|
| 1         | 28              | 10                 | 117              | 66                 | 39                 |
| 2         | 49              | 28                 | 127              | 63                 | 54                 |
| 3         | 39              | 16                 | 119              | 58                 | 40                 |
| 5         | 56              | 10                 | 101              | 66                 | 26                 |
| 7         | 43              | 17                 | 85               | 54                 | 44                 |
| 8         | 33              | 10                 | 123              | 51                 | 38                 |
| 11        | 37              | 10                 | 103              | 56                 | 25                 |
| 12        | 43              | 14                 | 117              | 60                 | 43                 |
| 13        | 58              | 12                 | 132              | 54                 | 33                 |
| 14        | 52              | 16                 | 114              | 67                 | 63                 |
| 15        | 92              | 10                 | 81               | 67                 | 37                 |
| 17        | 46              | 10                 | 96               | 53                 | 46                 |
| 19        | 31              | 10                 | 104              | 67                 | 18                 |
| 22        | 46              | 10                 | 120              | 65                 | 22                 |
| 23        | 63              | 18                 | 112              | 39                 | 41                 |
| 25        | 76              | 27                 | 94               | 59                 | 38                 |
| 26        | 44              | 10                 | 126              | 59                 | 22                 |
| 29        | 49              | 10                 | 100              | 64                 | 26                 |
| 30        | 38              | 13                 | 123              | 60                 | 41                 |
| 31        | 24              | 10                 | 107              | 67                 | 22                 |
| 32        | 56              | 17                 | 108              | 56                 | 29                 |
| 33        | 47              | 13                 | 124              | 61                 | 25                 |
| 34        | 60              | 11                 | 112              | 52                 | 41                 |
| 35        | 50              | 11                 | 120              | 64                 | 36                 |
| 36        | 38              | 13                 | 96               | 47                 | 71                 |
| 37        | 54              | 14                 | 103              | 65                 | 40                 |
| 38        | 44              | 16                 | 106              | 62                 | 42                 |
| 40        | 72              | 16                 | 98               | 59                 | 23                 |
| 41        | 103             | 17                 | 100              | 53                 | 51                 |
| 44        | 48              | 11                 | 118              | 37                 | 45                 |
| 48        | 59              | 12                 | 99               | 56                 | 39                 |
| 49        | 51              | 10                 | 117              | 67                 | 31                 |
| 51        | 67              | 10                 | 92               | 67                 | 28                 |
| 54        | 36              | 15                 | 100              | 43                 | 69                 |
| 55        | 66              | 23                 | 97               | 65                 | 42                 |
| 56        |                 |                    |                  |                    |                    |
| 10A       | 48              | 14                 | 131              | 37                 | 50                 |
| 10B       | 45              | 15                 | 120              | 44                 | 68                 |
| 18A       | 26              | 10                 | 101              | 52                 | 27                 |
| 18B       | 85              | 17                 | 125              | 54                 | 62                 |
| 20A       | 47              | 14                 | 121              | 66                 | 31                 |
| 20B       | 57              | 10                 | 123              | 60                 | 22                 |
| 21A       | 55              | 26                 | 116              | 38                 | 46                 |
| 21B       | 63              | 23                 | 75               | 57                 | 50                 |
| 24A       | 45              | 13                 | 64               | 56                 | 43                 |
| 24B       | 49              | 14                 | 123              | 41                 | 54                 |
| 28A       | 75              | 10                 | 103              | 60                 | 24                 |
| 28B       | 44              | 16                 | 102              | 68                 | 41                 |
| 42A       | 69              | 20                 | 94               | 49                 | 53                 |
| 42B       | 48              | 14                 | 88               | 62                 | 55                 |
| 4A        | 38              | 13                 | 92               | 47                 | 37                 |
| 4B        | 67              | 24                 | 95               | 47                 | 44                 |
| 50A       | 43              | 10                 | 89               | 64                 | 27                 |
| 50B       | 113             | 10                 | 126              | 27                 | 63                 |
| 53A       | 27              | 16                 | 114              | 63                 | 21                 |
| 53B       | 57              | 10                 | 101              | 55                 | 31                 |
| 9A        | 41              | 10                 | 119              | 69                 | 30                 |
| 9B        | 69              | 10                 | 91               | 63                 | 23                 |
